# Supplementary material for: Saikosaponin-d, a calcium mobilizing agent, sensitizes chemoresistant ovarian cancer cells to cisplatin-induced apoptosis by facilitating mitochondrial fission and G2/M arrest
Source: PubMed Central journal article supplement (PMC5725134; doi:10.18632/oncotarget.21076), 2017-09-16
Supplement: oncotarget-08-99825-s001.pdf [file oncotarget-08-99825-s001.pdf]

## Saikosaponin-d, a calcium mobilizing agent, sensitizes chemoresistant ovarian cancer cells to cisplatin-induced apoptosis by facilitating mitochondrial fission and G2/M arrest

### SUPPLEMENTARY MATERIALS

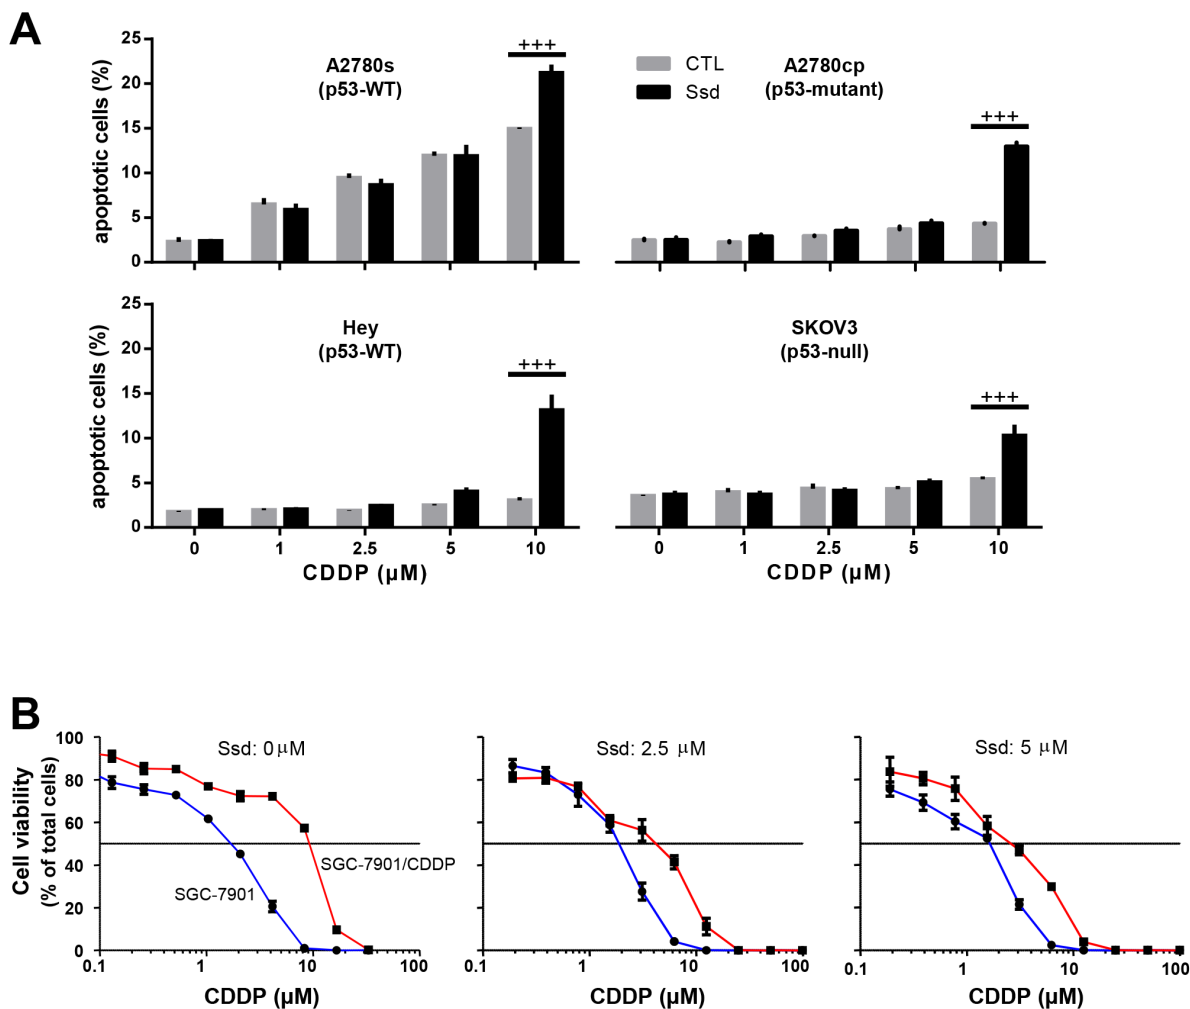

**Supplementary Figure 1: Ssd-induced sensitization to CDDP in the different cancer cells.** (A) Ssd (1 μM) sensitized OVCA cells to CDDP (10 μM) regardless of p53 status. A2780s, A2780cp, Hey and SKOV3 cells were cultured with CDDP (0-10 μM) and/or Ssd (1 μM, 24 h) and apoptosis were assessed.  $+++P < 0.001$  (vs respective CDDP). (B) Ssd-induced sensitization of p53 wild-type gastric cancer cells to CDDP. SGC-7901 cells were cultured with CDDP (0-100 μM) and/or Ssd (0-5 μM, 72 h) and cell viabilities were assessed by MTT assay. ( $n=3$ ).

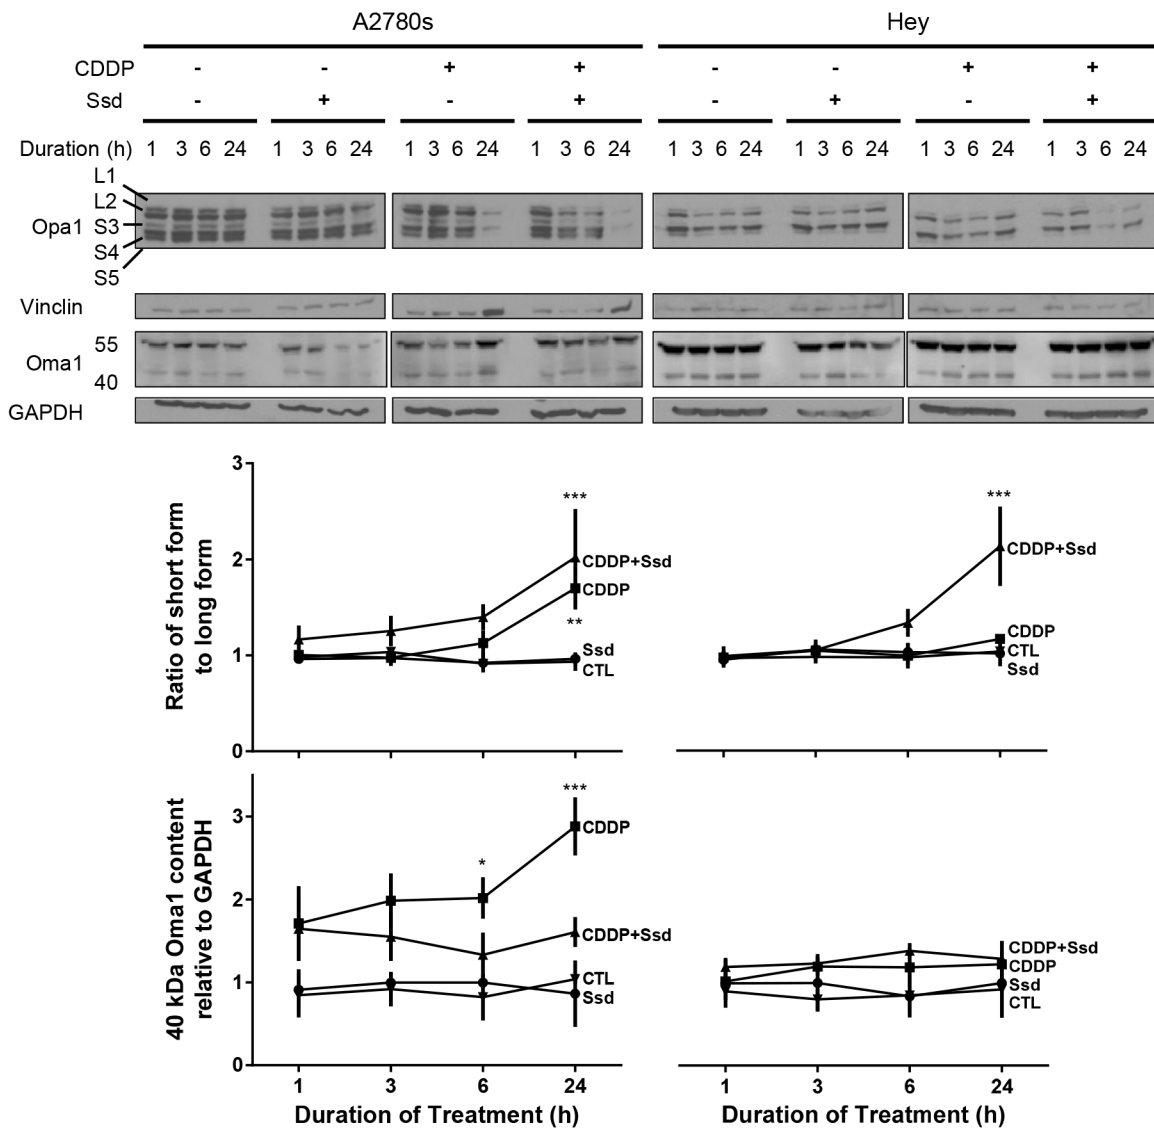

**Supplementary Figure 2: CDDP with Ssd-induced Opa1 processing in Oma1 and p53 independent manner.** A2780s and Hey cells were cultured with CDDP (10  $\mu$ M) and/or Ssd (1  $\mu$ M, 0-24 h). Opa1, Oma1, Vinculin and GAPDH contents were assessed by WB ( $n=3$ ). \* $P<0.05$ , \*\* $P<0.01$  and \*\*\* $P<0.001$  (vs respective CTL).

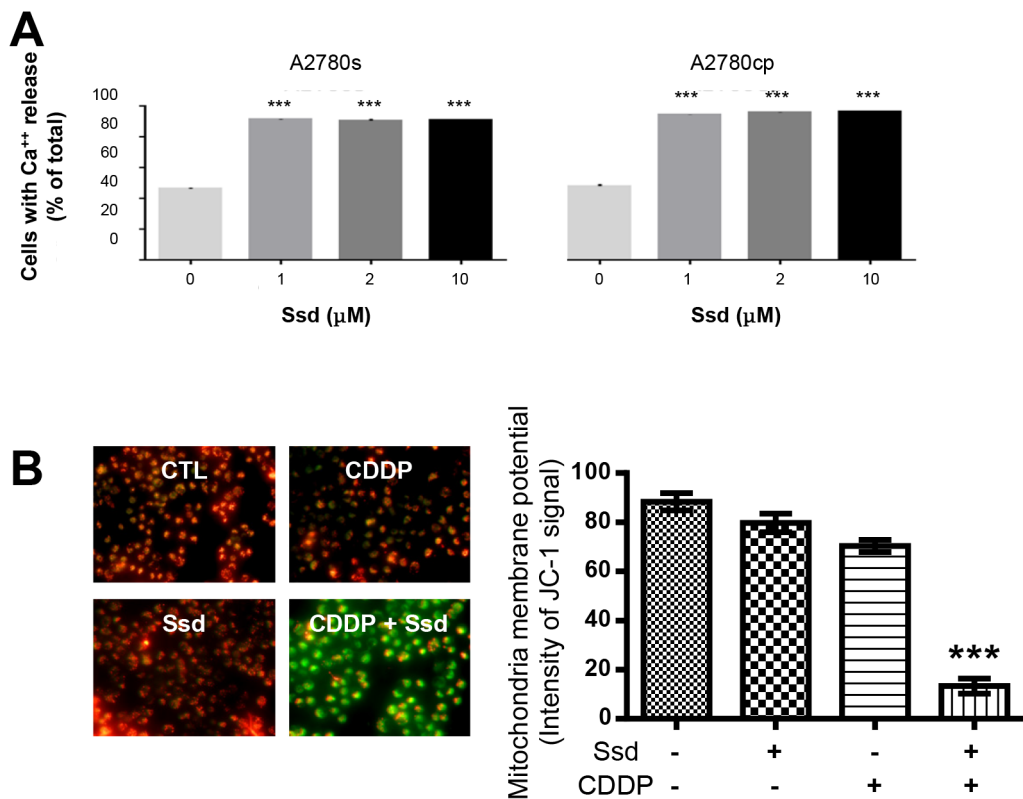

**Supplementary Figure 3: Ssd-increased [Ca<sup>2+</sup>]<sub>i</sub> and subsequent MMP loss in OVCA cells.** (A) A2780s and A2780cp cells were cultured with Ssd (0-10 μM, 4 h), treated with 5 μM Fluo-3-AM and assessed by FACS analysis (*n*=3). \*\*\**P*<0.001 (vs respective CTL). (B) CDDP with Ssd caused MMP loss. A2780s cells were cultured with CDDP (10 μM) and/or Ssd (2 μM, 24 h) and immunostained with JC-1.

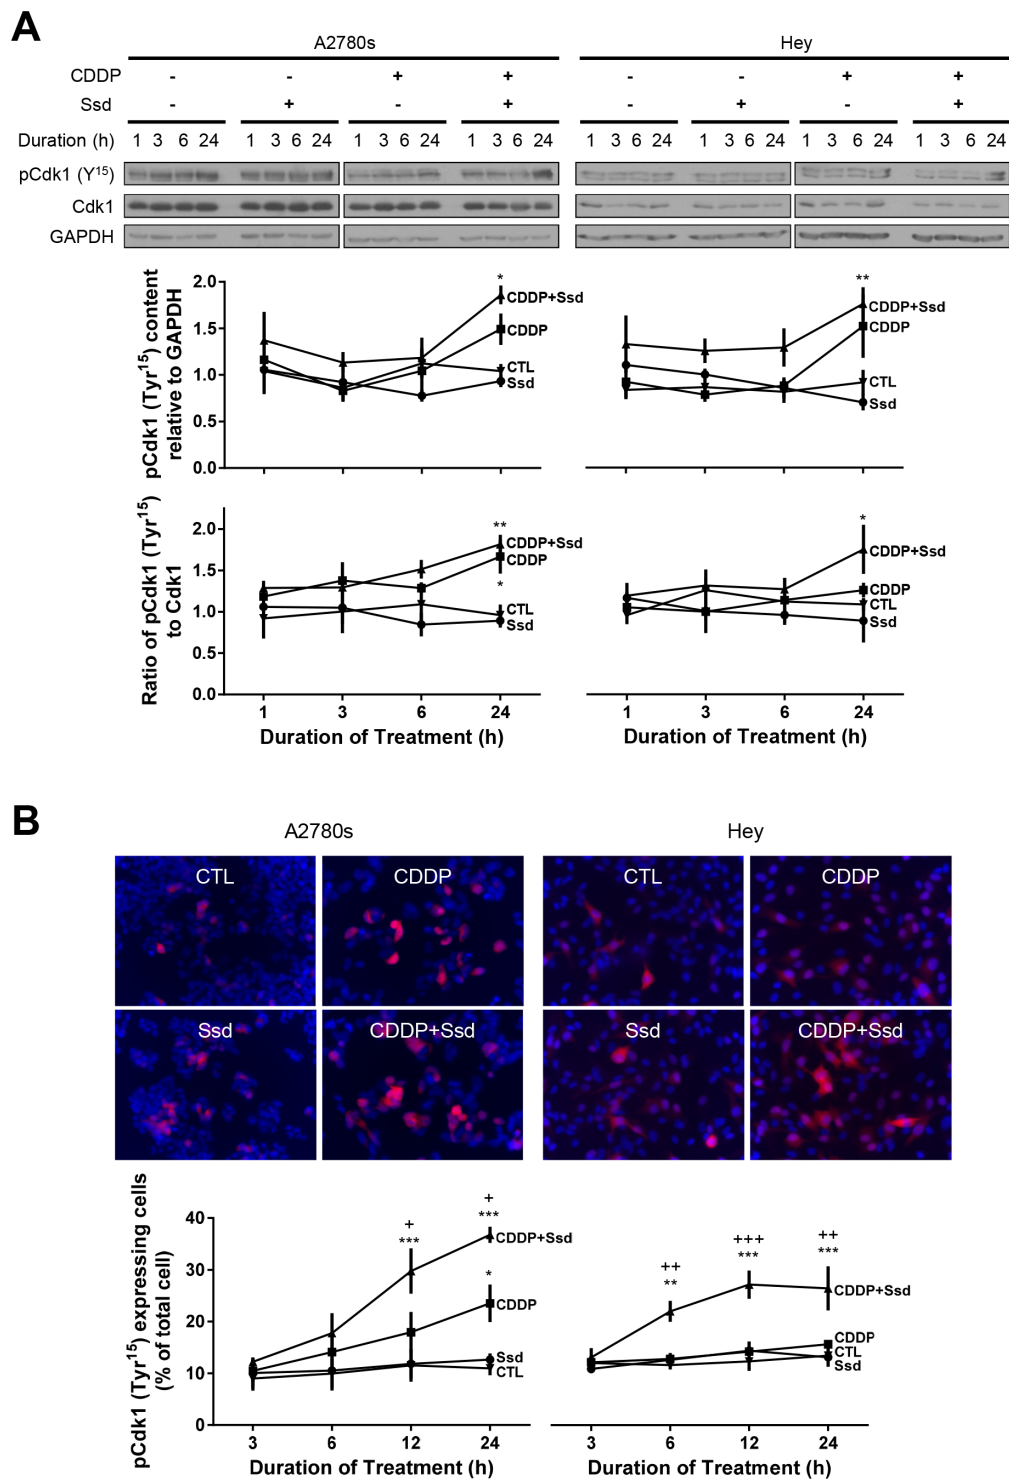

**Supplementary Figure 4: CDDP with Ssd-induced phosphorylation of Tyr<sup>15</sup>-Cdk1 in OVCA cells.** (A) CDDP with Ssd increased phosphor-Tyr<sup>15</sup>-Cdk1 contents. A2780s and Hey cells were cultured with CDDP (10 μM) and/or Ssd (1 μM, 0-24 h). Cdk1, phospho-Tyr<sup>15</sup>-Cdk1 and GAPDH contents were assessed by WB. (B) CDDP with Ssd increased the expression of phospho-Tyr<sup>15</sup>-Cdk1 in cytoplasm after 12 h in chemoresistant cells. A2780s and Hey cells were cultured with CDDP (10 μM) and Ssd (1 μM, 0-24 h) and immunostained with phospho-Tyr<sup>15</sup>-Cdk1 (n=3). \*P<0.05, \*\*P<0.01 and \*\*\*P<0.001 (vs respective CTL) and +P<0.05, ++P<0.01 and +++P<0.001 (vs respective CDDP). (n=3).

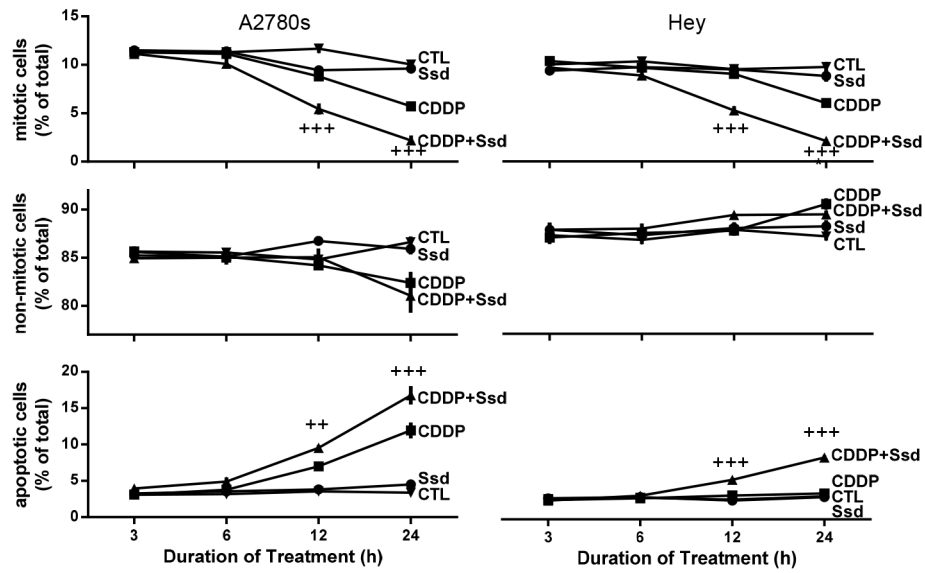

**Supplementary Figure 5: CDDP with Ssd increased apoptotic cells and decreased mitotic cells in OVCA cells.** A2780s and Hey cells were cultured with CDDP (10  $\mu$ M) and Ssd (1  $\mu$ M, 0-24 h), nuclei were immunostained with DAPI and apoptosis and mitosis were assessed (n=3). ++ $P$ <0.01 and +++ $P$ <0.001 (vs respective CDDP).

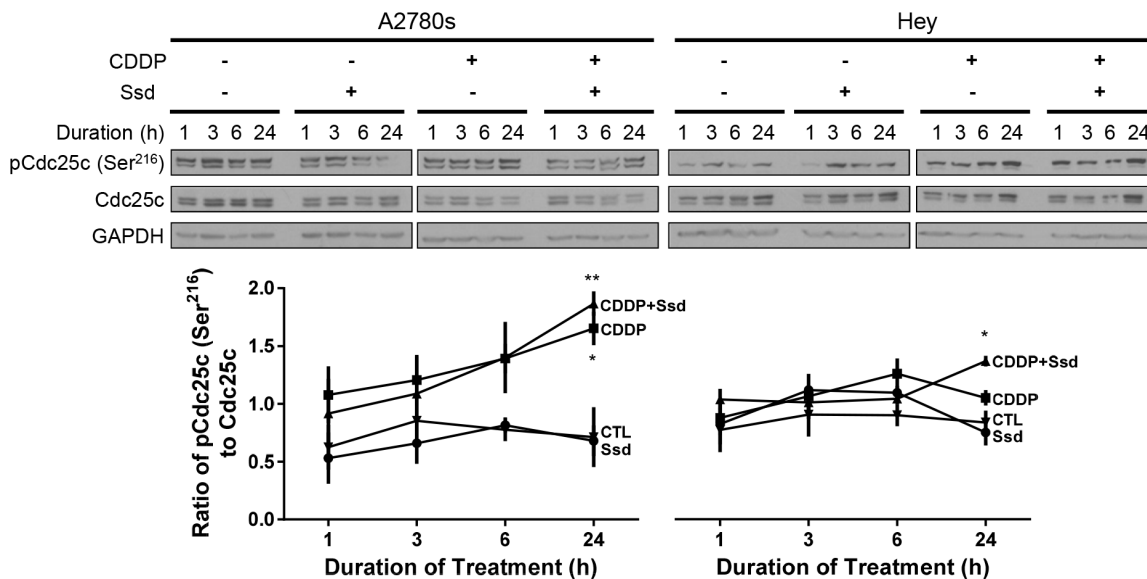

**Supplementary Figure 6: CDDP with Ssd-induced phosphorylation of Ser<sup>216</sup>-Cdc25c.** A2780s and Hey cells were cultured with CDDP (10  $\mu$ M) and/or Ssd (1  $\mu$ M, 0-24 h). Phospho-Ser<sup>216</sup>-Cdc25c, Cdc25c and GAPDH contents were assessed by WB ( $n=3$ ). \* $P<0.05$  and \*\* $P<0.01$  (vs respective CTL).

## Supplementary Table 1: Antibodies used in present studies

## A. Primary antibodies

| Name                               | Reactive species    | Source     | Dilution | company                   | Catalogue # | Application |
|------------------------------------|---------------------|------------|----------|---------------------------|-------------|-------------|
| phospho-Ser <sup>345</sup> -Chk1   | H, M, R, Mk         | Rabbit mAb | 1:1000   | Cell Signaling Technology | 2348        | WB          |
| vinculin                           | H, M, R, Mk         | Rabbit pAb | 1:1000   | Cell Signaling Technology | 4650        | WB          |
| phospho-Ser <sup>15</sup> -p53     | H, M, R, Mk         | Rabbit pAb | 1:1000   | Cell Signaling Technology | 9284        | WB          |
| phospho-Ser <sup>637</sup> -Drp1   | R, (H, M, Mk)       | Rabbit pAb | 1:500    | Cell Signaling Technology | 4867        | WB          |
| Chk1                               | H, M, R, Mk         | Mouse mAb  | 1:1000   | Cell Signaling Technology | 2360        | WB          |
| phospho-Ser <sup>216</sup> -Cdc25c | H                   | Rabbit pAb | 1:250    | Santa Cruz Biotechnology  | sc-12354-R  | WB          |
| CaMKI                              | H, M, R             | Mouse mAb  | 1:100    | Santa Cruz Biotechnology  | sc-137225   | WB          |
| Drp1                               | H                   | Mouse mAb  | 1:250    | Santa Cruz Biotechnology  | sc-271583   | WB          |
| p53                                | H                   | Mouse mAb  | 1:2000   | Santa Cruz Biotechnology  | sc-98       | WB          |
| Cyclin B1                          | H, M                | Mouse mAb  | 1:100    | Santa Cruz Biotechnology  | sc-7393     | WB          |
| Cdc25c                             | H                   | Mouse mAb  | 1:250    | Santa Cruz Biotechnology  | sc-13138    | WB          |
| Cdk1                               | H, M, R             | Rabbit mAb | 1:1000   | Abcam                     | ab32384     | WB          |
| phospho-Tyr <sup>15</sup> -Cdk1    | H, M, R             | Rabbit mAb | 1:1000   | Abcam                     | ab133463    | WB          |
| Oma1                               | H                   | Rabbit pAb | 1:500    | Abcam                     | ab104316    | WB          |
| PPM1D                              | H                   | Rabbit pAb | 1:250    | Abcam                     | ab37495     | WB          |
| Cdk1                               | H, M, R             | Mouse mAb  | 1:1000   | Abcam                     | ab18        | WB          |
| GAPDH                              | H, M, R, Rb, Hm, Mk | Mouse mAb  | 1:20000  | Abcam                     | ab8245      | WB          |
| phospho-Thr <sup>177</sup> -CaMKI  | H, M, R             | Rabbit pAb | 1:500    | LifeSpan BioSciences      | LS-C198718  | WB          |
| Opa1                               | H                   | Mouse mAb  | 1:1000   | BD Biosciences            | 612606      | WB          |
| β Tubulin                          | H, M, R             | Goat pAb   | 1:100    | Santa Cruz Biotechnology  | sc-9935     | IF          |
| β Tubulin                          | H, M, R             | Rabbit pAb | 1:25     | Santa Cruz Biotechnology  | sc-9104     | IF          |
| β Tubulin                          | H, M, R             | Mouse mAb  | 1:50     | Santa Cruz Biotechnology  | sc-5274     | IF          |
| Tom20                              | H, M, R             | Mouse mAb  | 1:200    | Santa Cruz Biotechnology  | sc-17764    | IF          |
| Cyclin B1                          | H, M                | Mouse mAb  | 1:50     | Santa Cruz Biotechnology  | sc-7393     | IF          |
| Cdk1                               | H, M, R             | Rabbit mAb | 1:100    | Abcam                     | ab32384     | IF          |
| phospho-Tyr <sup>15</sup> -Cdk1    | H, M, R             | Rabbit mAb | 1:100    | Abcam                     | ab133463    | IF          |

## B. Secondary antibodies

| Name                                                          | dilution | company                  | Catalogue # | Application |
|---------------------------------------------------------------|----------|--------------------------|-------------|-------------|
| Goat Anti-Rabbit IgG (H + L) horseradish peroxidase conjugate | 1:5000   | Bio-Rad Laboratories     | 170-6515    | WB          |
| Goat Anti-Mouse IgG (H + L) horseradish peroxidase conjugate  | 1:5000   | Bio-Rad Laboratories     | 170-6516    | WB          |
| Goat Anti-Rabbit Alexa Fluor 555 conjugate                    | 1:400    | Thermo Fisher Scientific | A21428      | IF          |
| Goat Anti-Mouse Alexa Fluor 488 conjugate                     | 1:400    | Thermo Fisher Scientific | A11001      | IF          |
| Donkey Anti-Goat Alexa Fluor 488 conjugate                    | 1:400    | Thermo Fisher Scientific | A11055      | IF          |

Western Blotting (WB), ImmunoFluorescence (IF), Monoclonal Antibody (mAb), Polyclonal Antibody (pAb) Cell Signaling Technology (Danvers, MA, USA), Santa Cruz Biotechnology (Santa Cruz, CA, USA), Abcam (Cambridge, MA, USA), LifeSpan BioSciences (Seattle, WA, USA), BD Biosciences (San Jose, CA, USA), Thermo Fisher Scientific (Waltham, MA, USA).
